# Supplementary material
Source: PubMed Central journal article supplement (PMC2638061)

# Interaction

(Anticipation > No-anticipation)No-self distraction

> (Anticipation > No-anticipation)Self distraction

Tonic response

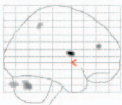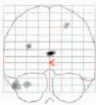

Phasic response

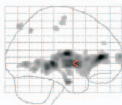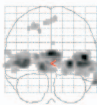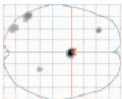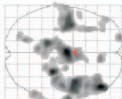

Linearly decreasing response

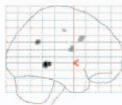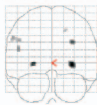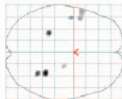

Supplement: NIHMS3665-supplement-supp_fig2.pdf [file NIHMS3665-supplement-supp_fig2.pdf]
