# Supplementary material
Source: PubMed Central journal article supplement (PMC2638061)

# Main effect of Anticipation

Tonic response

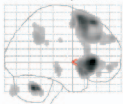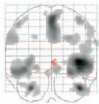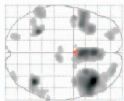

Phasic response

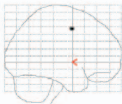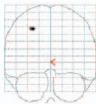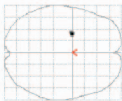

Linearly increasing response

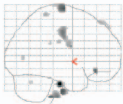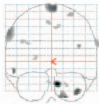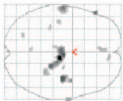

Supplement: NIHMS3665-supplement-supp_fig1.pdf [file NIHMS3665-supplement-supp_fig1.pdf]
